# Supplementary material for: Structure sensitivity of Cu supported on manganese oxide catalysts in levulinic acid hydrogenation
Source: Royal Society of Chemistry journal article supplement (doi:10.1039/d3cy01064c), 2023-12-15
Supplement: d3cy01064c1.pdf [file d3cy01064c1.pdf]

## Supporting Information

### Structure sensitivity of Cu supported on manganese oxide catalysts in Levulinic acid hydrogenation

Nayan Jyoti Mazumdar,<sup>a</sup> Praveen Kumar,<sup>b</sup> Miryam Arredondo-Arechavala,<sup>b</sup> Nancy Artioli,<sup>a,c</sup>  
and Haresh Manyar<sup>\*a</sup>

*a. School of Chemistry and Chemical Engineering, Queen's University Belfast, David-Keir Building, Stranmillis Road, Belfast, BT9 5AG, UK.*

*b. School of Maths and Physics, Queen's University Belfast, David-Keir Building, Stranmillis Road, Belfast, BT9 5AG, UK.*

*c. Department of Civil, Environmental, Architectural Engineering and Mathematics University of Brescia, Via Branze, 43, 25123 Brescia, Italy*

\*Corresponding Author: Haresh Manyar, [h.manyar@qub.ac.uk](mailto:h.manyar@qub.ac.uk)

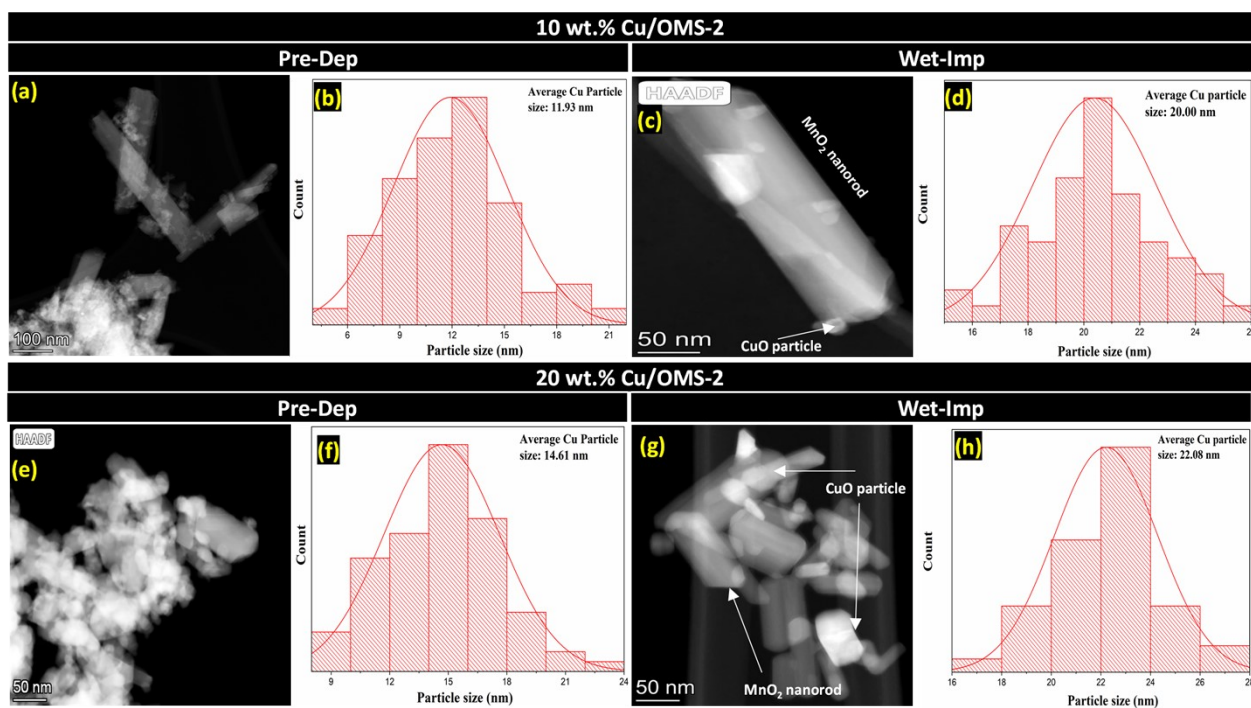

#### 1. TEM images

**Methodology:** The average particle size measurements and corresponding particle size distributions were performed using ImageJ. In each image, 90-100 measurements were done for computing the particle size distribution histograms, by fitting the particle size distribution histogram to the log-normal distribution function in OriginPro 2018.

## 2. N<sub>2</sub> adsorption–desorption isotherms

### 5 wt.% Cu/OMS-2

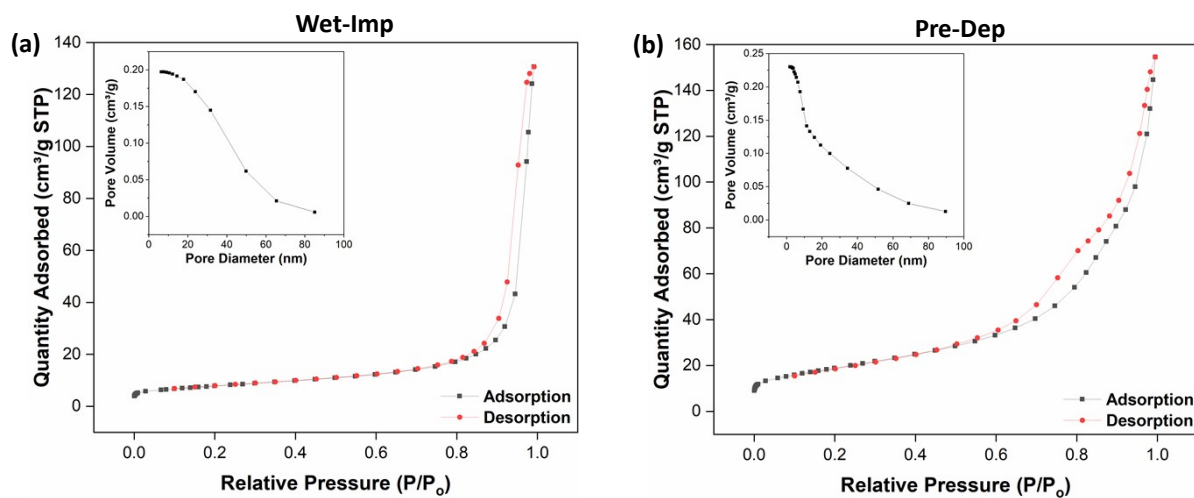

Figure S2. N<sub>2</sub> adsorption–desorption isotherms and pore volume profiles of 5 wt.% Cu/OMS-2, (a) Wet-Imp; (b) Pre-Dep.

### 10 wt.% Cu/OMS-2

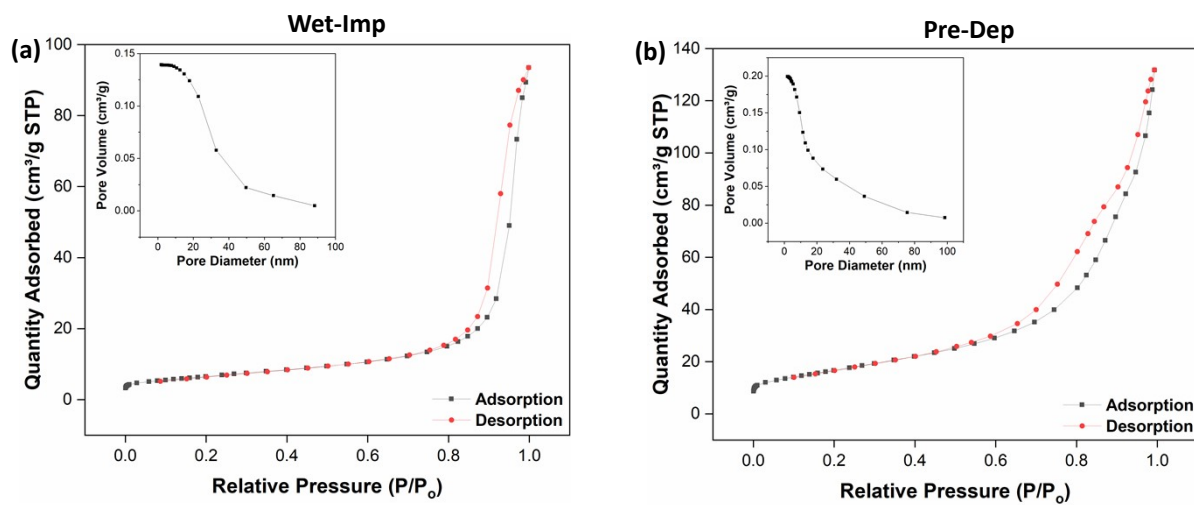

Figure S3. N<sub>2</sub> adsorption–desorption isotherms and pore volume profiles of 10 wt.% Cu/OMS-2, (a) Wet-Imp; (b) Pre-Dep.

### 20 wt.% Cu/OMS-2

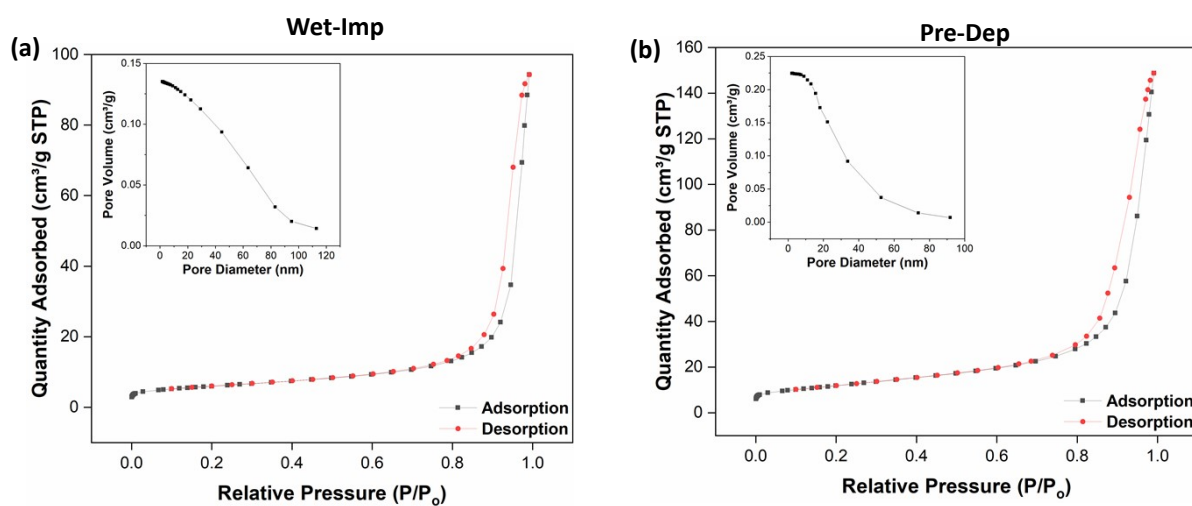

Figure S4.  $\text{N}_2$  adsorption–desorption isotherms and pore volume profiles of 20 wt.% Cu/OMS-2, (a) Wet-Imp; (b) Pre-Dep.
